# Supplementary material for: Alzheimer’s Disease Pathology in Middle Aged and Older People with HIV: Comparisons with Non-HIV Controls on a Healthy Aging and Alzheimer’s Disease Trajectory and Relationships with Cognitive Function
Source: MDPI journal article supplement (doi:10.3390/v15061319), 2023-06-04
Supplement: s1 [file s1]

SUPPLEMENTARY TABLES.

Supplementary Table 1. Comparison of characteristics of PWH sample by sex.

|                                                                       | Women with<br>HIV<br>(N=10) | Men with<br>HIV<br>(N=39) | Test Statistic, p-<br>value  |
|-----------------------------------------------------------------------|-----------------------------|---------------------------|------------------------------|
| <b>Demographics</b>                                                   |                             |                           |                              |
| Age, <i>mean (SD)</i>                                                 | 56.10 (5.04)                | 57.69 (5.06)              | F(1,47)=0.79,<br>p=.38       |
| Education years, <i>mean (SD)</i>                                     | 11.60 (2.17)                | 13.00 (3.05)              | F(1,43)=1.83,<br>p=.18       |
| Race/ethnicity                                                        |                             |                           |                              |
| White, N (%)                                                          | 2 (20%)                     | 26 (67%)                  | X <sup>2</sup> =7.08, p=.008 |
| Black, N (%)                                                          | 5 (50%)                     | 10 (26%)                  | X <sup>2</sup> =2.22, p=.14  |
| Hispanic, N (%)                                                       | 3 (30%)                     | 3 (8%)                    | X <sup>2</sup> =3.69, p=.05  |
| Other, N (%)                                                          | 0 (0%)                      | 0 (0%)                    | NA                           |
| APOE ε4 carrier, N (%)                                                | 2 (20.0%)                   | 9 (24.0%)                 | X <sup>2</sup> =0.05, p=.83  |
| WRAT-3 Reading Subtest, <i>mean (SD)</i>                              | 40.2 (9.3)                  | 50.0 (8.6)                | F(1,41)=9.50,<br>p=.004      |
| <b>Antemortem Clinical Comorbidities</b>                              |                             |                           |                              |
| History of alcohol use disorder, N (%)                                | 6 (60%)                     | 22 (61%)                  | X <sup>2</sup> =0.004, p=.97 |
| History of substance use disorder, N (%)                              | 7 (70%)                     | 23 (66%)                  | X <sup>2</sup> =0.02, p=.88  |
| Major depressive disorder, N (%)                                      | 8 (80%)                     | 24 (67%)                  | X <sup>2</sup> =0.20, p=.66  |
| Hypertension, N (%)                                                   | 3 (38%)                     | 15 (54%)                  | X <sup>2</sup> = 0.32, p=.57 |
| Diabetes, N (%)                                                       | 0 (0%)                      | 5 (18%)                   | X <sup>2</sup> = 1.43, p=.23 |
| Hyperlipidemia, N (%)                                                 | 0 (0%)                      | 8 (30%)                   | X <sup>2</sup> =2.37, p=.12  |
| <b>HIV Disease Characteristics</b>                                    |                             |                           |                              |
| Nadir CD4+ T-cell count (cells/μl),<br><i>mean (SD)</i>               | 100.29 (65.59)              | 97.17<br>(154.65)         | F(1,29)=0.00,<br>p=.96       |
| Antemortem CD4+ T-cell count<br>(cells/μl), <i>mean (SD)</i>          | 227.44 (260.02)             | 192.10<br>(230.46)        | F(1,46)=0.16,<br>p=0.69      |
| Antemortem detectable plasma HIV-1 RNA<br>load (>50 copies/mL), N (%) | 6 (60.0%)                   | 26 (66.7%)                | X <sup>2</sup> =0.16, p=.69  |
| Duration of HIV disease, years, <i>mean (SD)</i>                      | 12.60 (5.38)                | 15.32 (6.97)              | F(1,46)=1.30,<br>p=.26       |

|                                  |         |          |                     |
|----------------------------------|---------|----------|---------------------|
| Antemortem ART, N (% prescribed) | 6 (86%) | 28 (85%) | $X^2= 0.00$ $p=.98$ |
|----------------------------------|---------|----------|---------------------|

Note. PWH = people with HIV. ART = antiretroviral therapy. *APOE*  $\epsilon 4$  = apolipoprotein E  $\epsilon 4$  allele. WRAT-3 = Wide Range Achievement Test-version 3. Sex differences in sample characteristics were tested using chi-square tests for categorical variables and univariate analyses of variance (ANOVA) for normally-distributed continuous variables.

Supplementary Table 2. Comparison of the Alzheimer's disease pathology positivity rates between women and men with HIV.

|                                               | Women with HIV  | Men with HIV     | Chi-square, p-value, effect size ( $\phi$ ) |
|-----------------------------------------------|-----------------|------------------|---------------------------------------------|
| <b>A<math>\beta</math> positivity*, N (%)</b> |                 |                  |                                             |
| Frontal neocortex                             | 3 of 10 (30.0%) | 17 of 39 (43.6%) | $X^2=0.6$ , $p=.43$ , $\phi=0.11$           |
| Basal temporal neocortex                      | 5 of 8 (62.5%)  | 7 of 26 (26.9%)  | $X^2=3.4$ , $p=.07$ , $\phi=-0.32$          |
| Hippocampus                                   | 2 of 7 (28.6%)  | 4 of 25 (16.0%)  | $X^2=0.6$ , $p=.45$ , $\phi=-0.13$          |
| Any brain region                              | 5 of 8 (62.8%)  | 18 of 31 (58.1%) | $X^2=.05$ , $p=.82$ , $\phi=-0.04$          |
| Widespread A $\beta$ (any brain region)       | 3 of 8 (37.5%)  | 9 of 28 (32.1%)  | $X^2=.08$ , $p=.78$ , $\phi=-0.05$          |
| <b>P-Tau positivity*, N (%)</b>               |                 |                  |                                             |
| Frontal neocortex                             | 8 of 10 (80.0%) | 22 of 39 (56.4%) | $X^2=1.9$ , $p=.17$ , $\phi=-0.20$          |
| Basal temporal neocortex                      | 6 of 8 (75.0%)  | 18 of 26 (69.2%) | $X^2=0.1$ , $p=.75$ , $\phi=-0.05$          |
| Transentorhinal cortex                        | 6 of 7 (85.7%)  | 16 of 23 (69.6%) | $X^2=0.7$ , $p=.40$ , $\phi=-0.15$          |
| Entorhinal cortex                             | 5 of 7 (71.4%)  | 9 of 23 (39.1%)  | $X^2=2.2$ , $p=.13$ , $\phi=-0.13$          |
| Hippocampus                                   | 6 of 7 (85.7%)  | 16 of 25 (64.0%) | $X^2=1.2$ , $p=.27$ , $\phi=-0.19$          |
| Any brain region <sup>‡</sup>                 | 9 of 9 (100%)   | 32 of 33 (96.9%) | $X^2=0.28$ , $p=.60$ , $\phi=-0.08$         |
| Widespread p-tau (any brain region)           | 4 of 7 (57.1%)  | 11 of 24 (45.8%) | $X^2=1.2$ , $p=.27$ , $\phi=-0.10$          |

Note. \*Pathology positive was defined as pathology grade  $\geq 1$  with the density of A $\beta$  plaques graded as 0 (absent), 1 (focal), or 2 (widespread), and the density of p-Tau neuropil threads graded as 0 (absent), 1 (barely present at 100x magnification), 2 (easily noted at 100x magnification), or 3 (notable with naked eye inspection). <sup>‡</sup>Comparison is not possible as 100% of cases were p-tau positive in at-least one brain region. Effect size for differences in proportions is measured by the phi coefficient ( $\phi$ ): 0.1 = small, 0.3 = medium, 0.5 = large.

Supplementary Table 3. Comparison of memory performance (demographically-adjusted T-scores) between pathology positive (+) versus pathology negative (-) PWH in sex-stratified samples.

|                                         | Learning                |                         |                            | Recall                  |                         |                            |
|-----------------------------------------|-------------------------|-------------------------|----------------------------|-------------------------|-------------------------|----------------------------|
|                                         | Pathology+<br>Mean (SD) | Pathology-<br>Mean (SD) | ANOVA results              | Pathology+<br>Mean (SD) | Pathology-<br>Mean (SD) | ANOVA results              |
| <b>Women</b>                            |                         |                         |                            |                         |                         |                            |
| <b>A<math>\beta</math></b>              |                         |                         |                            |                         |                         |                            |
| Any brain region                        | 38.6 (8.2)              | 47.2 (1.5)              | F(1,6)=3.0, p=.13, d=1.46  | 40.3 (6.2)              | 47.7 (3.3)              | F(1,6)=3.5, p=.11, d=1.49  |
| Widespread A $\beta$ (any brain region) | 34.3 (8.1)              | 46.3 (1.6)              | F(1,6)=11.4, p=.01, d=2.06 | 36.5 (4.8)              | 47.0 (2.5)              | F(1,6)=3.1, p=.09, d=2.74  |
| <b>P-Tau</b>                            |                         |                         |                            |                         |                         |                            |
| Any brain region <sup>‡</sup>           | NA                      | NA                      | NA                         | NA                      | NA                      | NA                         |
| Widespread p-tau (any brain region)     | 37.5 (9.0)              | 47.2 (1.5)              | F(1,5)=3.2, p=.13, d=1.50  | 40.0 (7.1)              | 47.7 (3.3)              | F(1,5)=2.9, p=.15, d=1.39  |
| <b>Men</b>                              |                         |                         |                            |                         |                         |                            |
| <b>A<math>\beta</math></b>              |                         |                         |                            |                         |                         |                            |
| Any brain region                        | 39.2 (7.1)              | 46.4 (11.8)             | F(1,27)=4.1, p=.05, d=0.74 | 38.2 (9.8)              | 44.7 (10.7)             | F(1,27)=2.9, p=.10, d=0.63 |
| Widespread A $\beta$ (any brain region) | 38.8 (9.1)              | 44.5 (10.2)             | F(1,24)=1.7, p=.21, d=0.59 | 35.6 (9.9)              | 43.5 (10.2)             | F(1,24)=3.1, p=.09, d=0.79 |
| <b>P-Tau</b>                            |                         |                         |                            |                         |                         |                            |
| Any brain region <sup>‡</sup>           | NA                      | NA                      | NA                         | NA                      | NA                      | NA                         |
| Widespread p-tau (any brain region)     | 41.9 (7.5)              | 44.9 (13.0)             | F(1,21)=0.4, p=.52, d=0.28 | 40.7 (10.4)             | 43.4 (11.8)             | F(1,21)=0.3, p=.56, d=0.24 |

Note. Means and standard deviations (SD) are from domain-specific, demographically-adjusted T-scores. Pathology positive was defined as pathology grade  $\geq 1$  with the density of A $\beta$  plaques graded as 0 (absent), 1 (focal), or 2 (widespread), and the density of p-Tau neuropil threads graded as 0 (absent), 1 (barely present at 100x magnification), 2 (easily noted at 100x magnification), or 3 (notable with naked eye inspection). <sup>‡</sup>Comparison is not possible as 100% of cases were p-tau positive in at-least one brain region.

Supplementary Table 4. Comparison of performance in non-memory cognitive domains (demographically-adjusted domain T-scores) between pathology positive (+) versus pathology negative (-) PWH in sex-stratified samples.

|                                         | Executive Function              |                                 |                                   | Speed of Information Processing |                                 |                                   | Attention/Working Memory        |                                 |                                   | Verbal Fluency                  |                                 |                                    | Motor                           |                                 |                                  |
|-----------------------------------------|---------------------------------|---------------------------------|-----------------------------------|---------------------------------|---------------------------------|-----------------------------------|---------------------------------|---------------------------------|-----------------------------------|---------------------------------|---------------------------------|------------------------------------|---------------------------------|---------------------------------|----------------------------------|
|                                         | Path-<br>ology+<br>Mean<br>(SD) | Path-<br>ology-<br>Mean<br>(SD) | ANOVA<br>results                   | Path-<br>ology+<br>Mean<br>(SD) | Path-<br>ology-<br>Mean<br>(SD) | ANOVA<br>results                 |
| <b>Women</b>                            |                                 |                                 |                                   |                                 |                                 |                                   |                                 |                                 |                                   |                                 |                                 |                                    |                                 |                                 |                                  |
| <b>A<math>\beta</math></b>              |                                 |                                 |                                   |                                 |                                 |                                   |                                 |                                 |                                   |                                 |                                 |                                    |                                 |                                 |                                  |
| Any brain region                        | 47.7<br>(10.7)                  | 56.8<br>(14.9)                  | F(1,6)=1.0,<br>p=.35,<br>d=0.70   | 46.3<br>(6.3)                   | 42.9<br>(6.0)                   | F(1,6)=0.6,<br>p=.48,<br>d=0.55   | 49.5<br>(3.5)                   | 44.8<br>(6.3)                   | F(1,6)=1.9,<br>p=.22,<br>d=0.92   | 51.4<br>(7.2)                   | 53.0<br>(10.4)                  | F(1,6)=0.1,<br>p=.80,<br>d=0.18    | 45.2<br>(7.7)                   | 50.7<br>(3.9)                   | F(1,5)=0.9,<br>p=.40,<br>d=0.90  |
| Widespread A $\beta$ (any brain region) | 41.3<br>(5.5)                   | 57.0<br>(11.5)                  | F(1,6)=4.6,<br>p=.07,<br>d=1.74   | 43.1<br>(5.4)                   | 46.2<br>(6.6)                   | F(1,6)=0.5,<br>p=.52,<br>d=0.51   | 50.0<br>(1.0)                   | 46.4<br>(6.0)                   | F(1,6)=1.1,<br>p=.35,<br>d=0.84   | 47.7<br>(7.2)                   | 54.6<br>(7.7)                   | F(1,6)=1.6,<br>p=.25,<br>d=0.93    | 47.2<br>(8.5)                   | 46.5<br>(7.1)                   | F(1,6)=0.01,<br>p=.91,<br>d=0.09 |
| <b>P-Tau</b>                            |                                 |                                 |                                   |                                 |                                 |                                   |                                 |                                 |                                   |                                 |                                 |                                    |                                 |                                 |                                  |
| Any brain region <sup>y</sup>           | NA                              | NA                              | NA                                 | NA                              | NA                              | NA                               |
| Widespread p-tau (any brain region)     | 48.6<br>(12.1)                  | 56.8<br>(14.9)                  | F(1,5)=0.7,<br>p=.45,<br>d=0.60   | 47.7<br>(6.3)                   | 42.9<br>(5.9)                   | F(1,5)=1.0,<br>p=.36,<br>d=0.79   | 49.6<br>(4.0)                   | 44.8<br>(6.3)                   | F(1,5)=1.5,<br>p=.27,<br>d=0.91   | 53.2<br>(6.8)                   | 53.0<br>(10.4)                  | F(1,5)=0.0<br>01, p=.97,<br>d=0.02 | 46.9<br>(7.8)                   | 50.7<br>(3.9)                   | F(1,5)=0.4,<br>p=.56,<br>d=0.62  |
| <b>Men</b>                              |                                 |                                 |                                   |                                 |                                 |                                   |                                 |                                 |                                   |                                 |                                 |                                    |                                 |                                 |                                  |
| <b>A<math>\beta</math></b>              |                                 |                                 |                                   |                                 |                                 |                                   |                                 |                                 |                                   |                                 |                                 |                                    |                                 |                                 |                                  |
| Any brain region                        | 55.6<br>(12.7)                  | 52.6<br>(12.0)                  | F(1,27)=0.<br>4, p=.51,<br>d=0.24 | 44.2<br>(11.4)                  | 50.7<br>(12.5)                  | F(1,25)=2.<br>0, p=.17,<br>d=0.54 | 45.6<br>(10.6)                  | 49.0<br>(7.2)                   | F(1,27)=1.<br>0, p=.33,<br>d=0.38 | 46.2<br>(9.3)                   | 54.5<br>(13.7)                  | F(1,27)=3.<br>7, p=.06,<br>d=0.71  | 37.0<br>(8.8)                   | 40.3<br>(9.6)                   | F(1,27)=0.9,<br>p=.36,<br>d=0.36 |
| Widespread A $\beta$ (any brain region) | 57.2<br>(15.2)                  | 53.1<br>(12.2)                  | F(1,24)=0.<br>5, p=.48,<br>d=0.3  | 46.0<br>(8.7)                   | 49.8<br>(11.7)                  | F(1,22)=0.<br>5, p=.48,<br>d=0.37 | 39.8<br>(7.7)                   | 49.8<br>(8.5)                   | F(1,24)=7.<br>4, p=.01,<br>d=1.23 | 43.1<br>(9.8)                   | 53.0<br>(12.7)                  | F(1,24)=3.<br>4, p=.08,<br>d=0.87  | 35.7<br>(9.0)                   | 39.9<br>(8.3)                   | F(1,24)=1.1,<br>p=.32,<br>d=0.49 |

|                                              |                |                |                                           |               |                |                                           |               |                |                                            |               |                |                                            |               |               |                                            |    |
|----------------------------------------------|----------------|----------------|-------------------------------------------|---------------|----------------|-------------------------------------------|---------------|----------------|--------------------------------------------|---------------|----------------|--------------------------------------------|---------------|---------------|--------------------------------------------|----|
| brain<br>region)                             |                |                |                                           |               |                |                                           |               |                |                                            |               |                |                                            |               |               |                                            |    |
| <b>P-Tau</b>                                 |                |                |                                           |               |                |                                           |               |                |                                            |               |                |                                            |               |               |                                            |    |
| Any brain<br>region <sup>‡</sup>             | NA             | NA             | NA                                        | NA            | NA             | NA                                        | NA            | NA             | NA                                         | NA            | NA             | NA                                         | NA            | NA            | NA                                         | NA |
| Widespread<br>p-tau (any<br>brain<br>region) | 52.7<br>(11.1) | 54.4<br>(15.8) | F(1,21)=0.<br>1, p=.77,<br><i>d</i> =0.12 | 48.9<br>(9.3) | 51.4<br>(12.7) | F(1,19)=0.<br>3, p=.61,<br><i>d</i> =0.22 | 48.3<br>(9.3) | 47.4<br>(10.1) | F(1,21)=0.<br>05, p=.83,<br><i>d</i> =0.09 | 50.6<br>(8.3) | 51.4<br>(16.4) | F(1,21)=0.<br>02, p=.88,<br><i>d</i> =0.06 | 39.7<br>(9.5) | 40.0<br>(7.1) | F(1,21)=0.01<br>, p=.93,<br><i>d</i> =0.04 |    |

Note. Means and standard deviations (SD) are from domain-specific, demographically-adjusted T-scores. Pathology positive was defined as pathology grade  $\geq 1$  with the density of A $\beta$  plaques graded as 0 (absent), 1 (focal), or 2 (widespread), and the density of p-Tau neuropil threads graded as 0 (absent), 1 (barely present at 100x magnification), 2 (easily noted at 100x magnification), or 3 (notable with naked eye inspection). <sup>‡</sup> Comparison is not possible as 100% of cases were p-tau positive in at-least one brain region.

Supplementary Table 5. Summary of sex-stratified results examining relationships between A $\beta$  and p-Tau positivity status and domain-specific cognitive function.

| <u>Cognitive Domain</u>                | <u>A<math>\beta</math> pathology (any brain region)</u><br><u>effect size (statistical significance)</u> | <u>Wide-spread A<math>\beta</math> pathology (any brain region),</u><br><u>effect size (statistical significance)</u> | <u>p-Tau pathology (any brain region)<sup>‡</sup>,</u><br><u>effect size (statistical significance)</u> | <u>Wide-spread p-Tau pathology (any brain region),</u><br><u>effect size (statistical significance)</u> |
|----------------------------------------|----------------------------------------------------------------------------------------------------------|-----------------------------------------------------------------------------------------------------------------------|---------------------------------------------------------------------------------------------------------|---------------------------------------------------------------------------------------------------------|
| <b><u>Women with HIV</u></b>           |                                                                                                          |                                                                                                                       |                                                                                                         |                                                                                                         |
| <u>Learning</u>                        | <b><u>L (-)</u></b>                                                                                      | <b><u>L (+)</u></b>                                                                                                   | <u>NA</u>                                                                                               | <b><u>L (-)</u></b>                                                                                     |
| <u>Recall</u>                          | <b><u>L (-)</u></b>                                                                                      | <b><u>L (T)</u></b>                                                                                                   | <u>NA</u>                                                                                               | <b><u>L (-)</u></b>                                                                                     |
| <u>Executive Function</u>              | <b><u>L (-)</u></b>                                                                                      | <b><u>L (T)</u></b>                                                                                                   | <u>NA</u>                                                                                               | <b><u>M (-)</u></b>                                                                                     |
| <u>Speed of Information Processing</u> | <b><u>M (-)</u></b>                                                                                      | <b><u>M (-)</u></b>                                                                                                   | <u>NA</u>                                                                                               | <b><u>L (-)</u></b>                                                                                     |
| <u>Attention/Working Memory</u>        | <b><u>L (-)</u></b>                                                                                      | <b><u>L (-)</u></b>                                                                                                   | <u>NA</u>                                                                                               | <b><u>L (-)</u></b>                                                                                     |
| <u>Verbal Fluency</u>                  | <b><u>S (-)</u></b>                                                                                      | <b><u>L (-)</u></b>                                                                                                   | <u>NA</u>                                                                                               | <b><u>S (-)</u></b>                                                                                     |
| <u>Motor</u>                           | <b><u>L (-)</u></b>                                                                                      | <b><u>S (-)</u></b>                                                                                                   | <u>NA</u>                                                                                               | <b><u>M (-)</u></b>                                                                                     |
| <b><u>Men with HIV</u></b>             |                                                                                                          |                                                                                                                       |                                                                                                         |                                                                                                         |
| <u>Learning</u>                        | <b><u>L (+)</u></b>                                                                                      | <b><u>M (-)</u></b>                                                                                                   | <u>NA</u>                                                                                               | <b><u>S (-)</u></b>                                                                                     |
| <u>Recall</u>                          | <b><u>M (T)</u></b>                                                                                      | <b><u>L (T)</u></b>                                                                                                   | <u>NA</u>                                                                                               | <b><u>S (-)</u></b>                                                                                     |
| <u>Executive Function</u>              | <b><u>S (-)</u></b>                                                                                      | <b><u>S (-)</u></b>                                                                                                   | <u>NA</u>                                                                                               | <b><u>S (-)</u></b>                                                                                     |
| <u>Speed of Information Processing</u> | <b><u>M (-)</u></b>                                                                                      | <b><u>M (-)</u></b>                                                                                                   | <u>NA</u>                                                                                               | <b><u>S (-)</u></b>                                                                                     |
| <u>Attention/Working Memory</u>        | <b><u>M (-)</u></b>                                                                                      | <b><u>L (+)</u></b>                                                                                                   | <u>NA</u>                                                                                               | <b><u>S (-)</u></b>                                                                                     |
| <u>Verbal Fluency</u>                  | <b><u>L (T)</u></b>                                                                                      | <b><u>L (T)</u></b>                                                                                                   | <u>NA</u>                                                                                               | <b><u>S (-)</u></b>                                                                                     |
| <u>Motor</u>                           | <b><u>S (-)</u></b>                                                                                      | <b><u>M (-)</u></b>                                                                                                   | <u>NA</u>                                                                                               | <b><u>S (-)</u></b>                                                                                     |

Note. Cells represent Cohen's *d* effect size for relationships between pathology positivity status (yes/no) and domain-specific cognitive function: L= large effect size, M = moderate effect size, S = small effect size. Large (strong) relationships are bolded. Effect sizes are reported and guided the interpretation of results in the sex-stratified analyses due to the small sample size of women with HIV and the sample size disparity between men and women with HIV. (+) indicates a significant association at  $p < .05$ , (T) indicates a relationship that is a statistical trend,  $p \leq .10$  and (-) indicates a relationship that is not significant or a trend. <sup>‡</sup> Comparison is not possible as 100% of cases were p-tau positive in at-least one brain region.
